# Supplementary material for: Utilizing Network Pharmacology to Explore the Possible Mechanism of CoptidisRhizoma in Kawasaki Disease
Source: Research Square preprint supplement (doi:10.21203/rs.3.rs-90022/v1), 2020-10-14
Supplement: Supplementary file 1 [file cf59fab2c189c20fa126251a.xlsx]

## Sheet: Sheet1
Compound	Target genes
WORENINE	RAC1
COPTISINE	RAC1
EPIBERBERINE	RAC1
PALMATINE	RAC1
BERBERINE	RAC1
BERLAMBINE	RAC1
BERBERINE	RAC1
BERBERRUBINE	RAC1
BERBERRUBINE	RAC1
PALMATINE	RAC1
COPTISINE	RAC1
BERBERINE	HMOX1
BERBERINE	NOS2
BERBERRUBINE	NOS2
BERBERRUBINE	NOS2
BERLAMBINE	NOS2
PALMATINE	NOS2
COPTISINE	NOS2
WORENINE	NOS2
MAGNOGRANDIOLIDE	NOS2
EPIBERBERINE	FLT1
EPIBERBERINE	FGFR1
PALMATINE	TBK1
EPIBERBERINE	MAPK10
MAGNOGRANDIOLIDE	MAPK14
PALMATINE	MAPK10
（R）-CANADINE	MAPK1
BERBERINE	MAPK14
BERLAMBINE	MAPK10
BERLAMBINE	MAPK1
BERBERINE	MAPK1
BERLAMBINE	Mapk1
EPIBERBERINE	IKBKB
BERBERINE	IKBKB
MAGNOGRANDIOLIDE	TYK2
（R）-CANADINE	PIK3CA
（R）-CANADINE	PIK3CA
BERLAMBINE	PIK3CA
BERLAMBINE	PIK3CA
BERLAMBINE	F7
PALMATINE	F7
EPIBERBERINE	MAPK8
PALMATINE	MAPK8
（R）-CANADINE	MAPK8
BERBERINE	MAPK8
BERLAMBINE	MAPK8
MAGNOGRANDIOLIDE	CXCR2
EPIBERBERINE	ICAM1
BERBERINE	ICAM1
BERLAMBINE	MAPK3
MAGNOGRANDIOLIDE	LRRK2
EPIBERBERINE	MAPK10
PALMATINE	MAPK10
BERLAMBINE	MAPK10
PALMATINE	FGFR3
PALMATINE	HSP90AB1
（R）-CANADINE	TBXA2R
MAGNOGRANDIOLIDE	RELA
BERBERINE	NOS3
BERBERRUBINE	NOS3
EPIBERBERINE	NOS3
BERLAMBINE	NOS3
PALMATINE	NOS3
COPTISINE	NOS3
EPIBERBERINE	SRC
BERBERINE	SRC
EPIBERBERINE	SELE
BERBERINE	SELE
BERLAMBINE	ABCC4
MAGNOGRANDIOLIDE	NR3C1
PALMATINE	MTOR
MAGNOGRANDIOLIDE	MAPK14
BERBERINE	MAPK14
BERBERINE	TP53
PALMATINE	TGFBR2
（R）-CANADINE	KCNN2
（R）-CANADINE	KCNN2
MAGNOGRANDIOLIDE	MPO
BERBERINE	AKT1
BERBERINE	PTGS2
BERBERRUBINE	PTGS2
BERBERRUBINE	PTGS2
（R）-CANADINE	PTGS2
BERLAMBINE	PTGS2
PALMATINE	PTGS2
COPTISINE	PTGS2
WORENINE	PTGS2
EPIBERBERINE	PTGS2
MAGNOGRANDIOLIDE	PTGS2
（R）-CANADINE	PTGS2
BERBERINE	PTGS2
BERBERINE	ESR1
BERBERRUBINE	ESR1
EPIBERBERINE	ESR1
PALMATINE	ESR1
COPTISINE	ESR1
WORENINE	ESR1
（R）-CANADINE	ESR1
BERLAMBINE	GSK3A
WORENINE	PRF1
EPIBERBERINE	PRF1
PALMATINE	PRF1
BERBERINE	PRF1
BERLAMBINE	PRF1
BERLAMBINE	IRAK4
WORENINE	ACHE
COPTISINE	ACHE
EPIBERBERINE	ACHE
PALMATINE	ACHE
（R）-CANADINE	ACHE
BERBERINE	ACHE
BERLAMBINE	ACHE
BERBERINE	ACHE
BERBERINE	ACHE
BERBERRUBINE	ACHE
BERBERRUBINE	ACHE
（R）-CANADINE	ACHE
BERLAMBINE	ACHE
PALMATINE	ACHE
PALMATINE	ACHE
COPTISINE	ACHE
WORENINE	ACHE
BERBERINE	CASP3
PALMATINE	PGK1
BERLAMBINE	PGK1
